# Supplementary material for: Foliar Application or Seed Priming of Cholic Acid-Glycine Conjugates can Mitigate/Prevent the Rice Bacterial Leaf Blight Disease via Activating Plant Defense Genes
Source: PubMed Central journal article supplement (PMC8497891; doi:10.3389/fpls.2021.746912), 2021-09-24
Supplement: Data_Sheet_1.pdf [file Data_Sheet_1.pdf]

## Supplementary information

**Table S1. Primers used in this study**

| <b>S.No</b> | <b>Primer Name</b> | <b>Sequence 5'-3'</b>  |
|-------------|--------------------|------------------------|
|             | qRT_OsMKK4_F'      | CCGGAGTTCAAGAGCTTCAT   |
|             | qRT_OsMKK4_R'      | GACGAACCGATGTTGGAGAA   |
|             | qRT_Os ICS1_F'     | TGAGTTCGCTGTTGGGATTAG  |
|             | qRT_Os ICS1_R'     | ATTCCGGCACCAGCATAAA    |
|             | qRT_OsEDS1_F'      | TGGTCCATGTCTGGAAGTTTAG |
|             | qRT_OsEDS1_R'      | TGATGCAGATCTGTGGTTCTC  |
|             | qRT_OsPAD4_F'      | CTTCTACCAGCTCCTTGTTGAG |
|             | qRT_OsPAD4_R'      | GGCCATGGGTGATGTAAGAG   |
|             | qRT_OsNPR1_F'      | CTACGAGGAAGGTTGCTGTATC |
|             | qRT_OsNPR1_R'      | TCCATCCACTTGAGCAATATCC |
|             | qRT_PR1a_F'        | GGCACTACACGCAGGTG      |
|             | qRT_PR1a_R'        | CGAGTAGTTGCAGGTGATGAA  |
|             | qRT_OsVOZ2_F'      | CCCGGTCCTTCTAATGCTTATC |
|             | qRT_OsVOZ2_R'      | CGCTTCTTTCGGTGGAGTAT   |
|             | qRT_SWEET14_F'     | TCTCCTTCTCCCTCACCATC   |
|             | qRT_SWEET14_R'     | CGTTGGGAAGAGCGACATATT  |
|             | qRT_WRKY5_F'       | GCTACTACCGATGCACAAT    |
|             | qRT_WRKY5_R'       | TCGTAGGTGGTGTGATGAGGAT |
|             | qRT_OsWRKY13_F'    | AACAGAAGGCTGTGGTTGAG   |
|             | qRT_OsWRKY13_R'    | TGGTCGATCCATCCGAAGT    |
|             | qRT_OsWRKY45_F'    | AACTCCAAGCACCCAAAGG    |
|             | qRT_OsWRKY45_R'    | CCGATGTAGGTGACCCTGTA   |

**Table S2. Correlation between pre and post infection of *Xoo* with response to C6 CAGC**

| Correlation between pre and post infection with response to C6 CAGC |        |
|---------------------------------------------------------------------|--------|
| Colony forming units                                                | 0.9996 |
| Evan's blue concentration                                           | 0.8367 |
| Lesion length                                                       | 0.9862 |

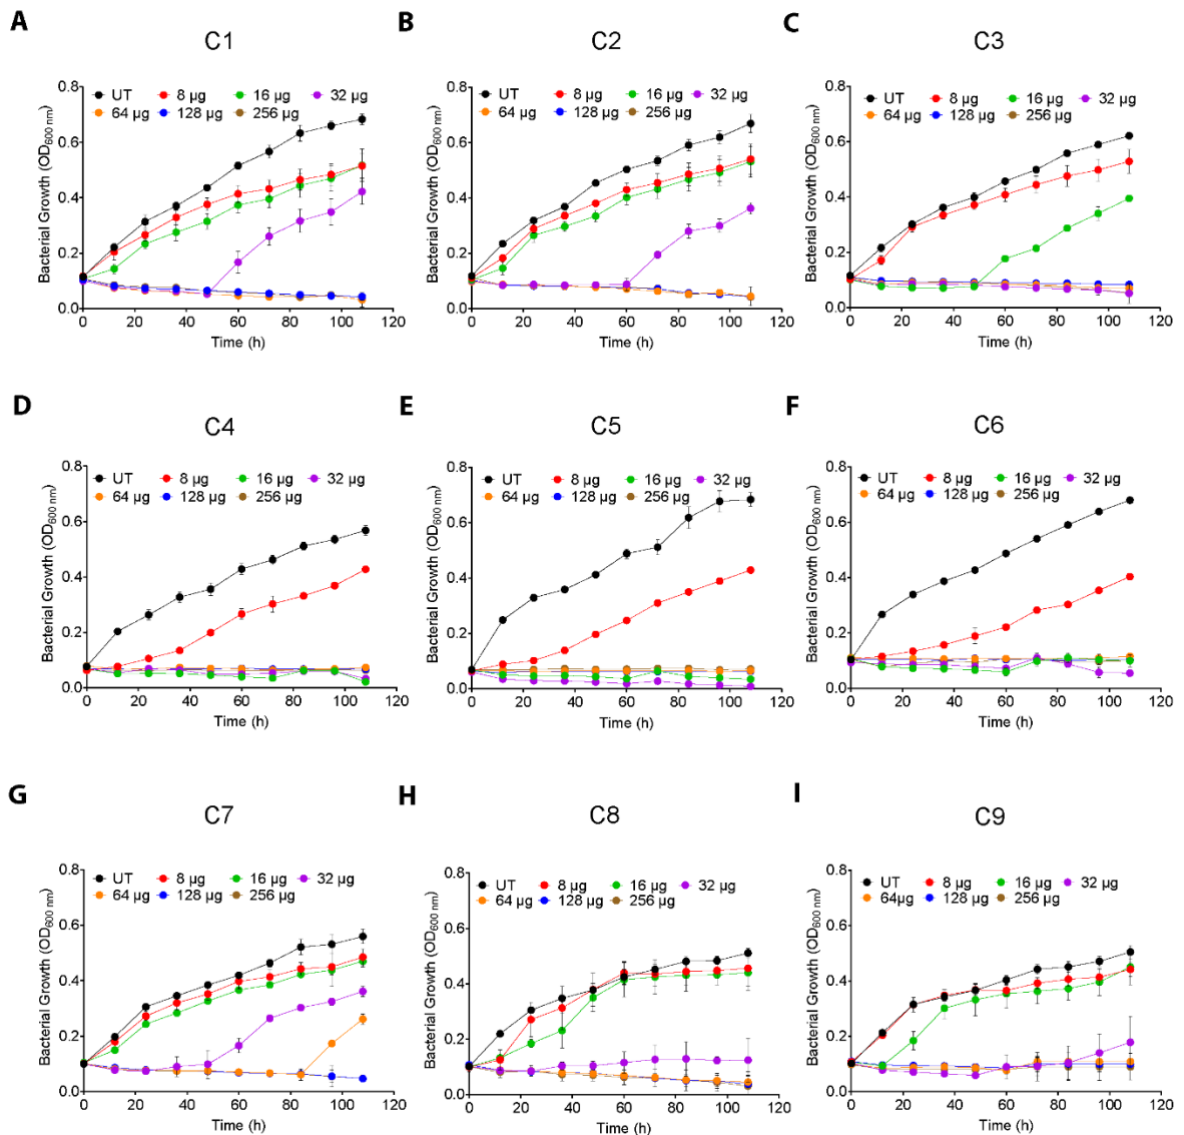

**Figure S1. Antimicrobial activity of Cholic acid glycine conjugates (CAGC).** (A-I) Screening of CAGCs library against *Xoo* in *in-vitro* growth conditions at different time points to identify potential antimicrobial compound with MIC<sub>99</sub> required to kill the pathogen. *Xoo* culture of 1\*10<sup>8</sup> cfu/ml concentration was used as starting culture to treat with different concentrations of the CAGC molecules. The bacterial growth was measured at absorbance 600 nm at every 12 h intervals. Time-dependent growth of *Xanthomonas oryzae pv. oryzae* (*Xoo*) with CAGC compounds 1, 2, 3, 4, 5, 6, 7, 8, 9 and kanamycin. C4, C5 and C6 showed MIC<sub>99</sub> at 16µg. The *Xoo* cultures in 96 well plates was treated with different concentrations of CAGCs in quadruplicate wells.

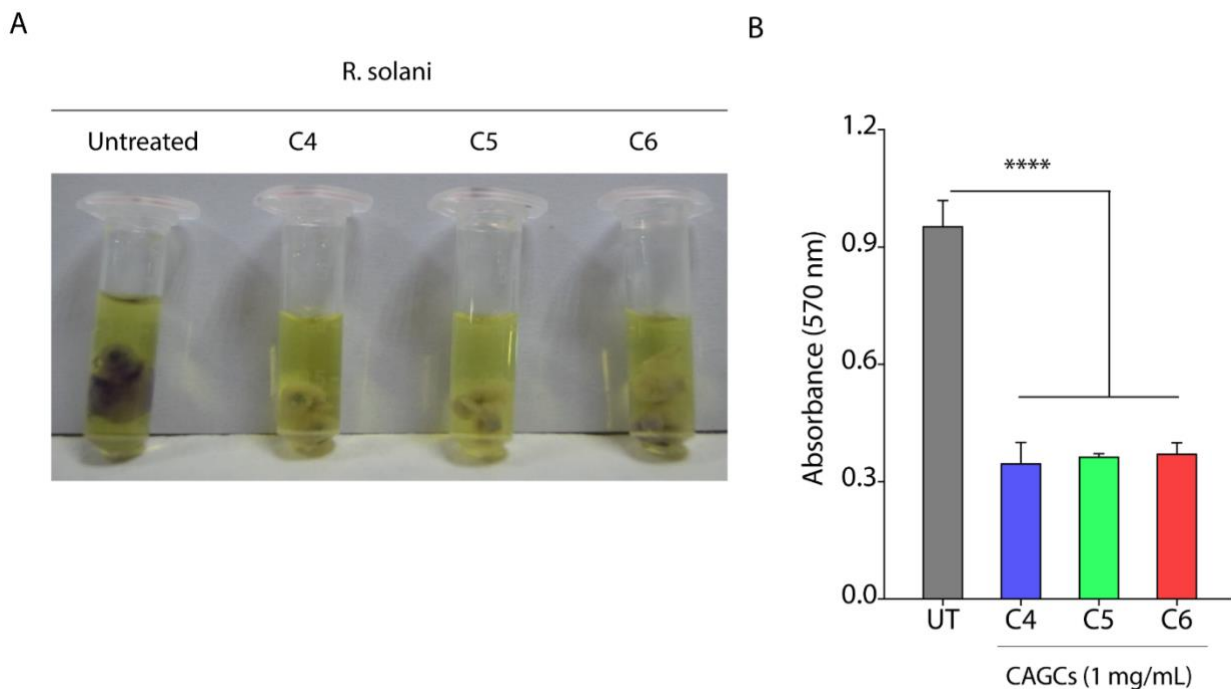

**Figure S2. Response of *R. solani* mycelia with different CAGCs treatment.** (A) Detection of coloured compound (formazan) produced by *R. solani* mycelia upon MTT staining. (B) Quantification of formazon by spectrophotometer analysis (OD<sub>570</sub> nm). Graphs show mean values ± standard deviation (S.E). Statistical significant difference between indicated groups at  $p < 0.001$  (estimated by one-way ANOVA).

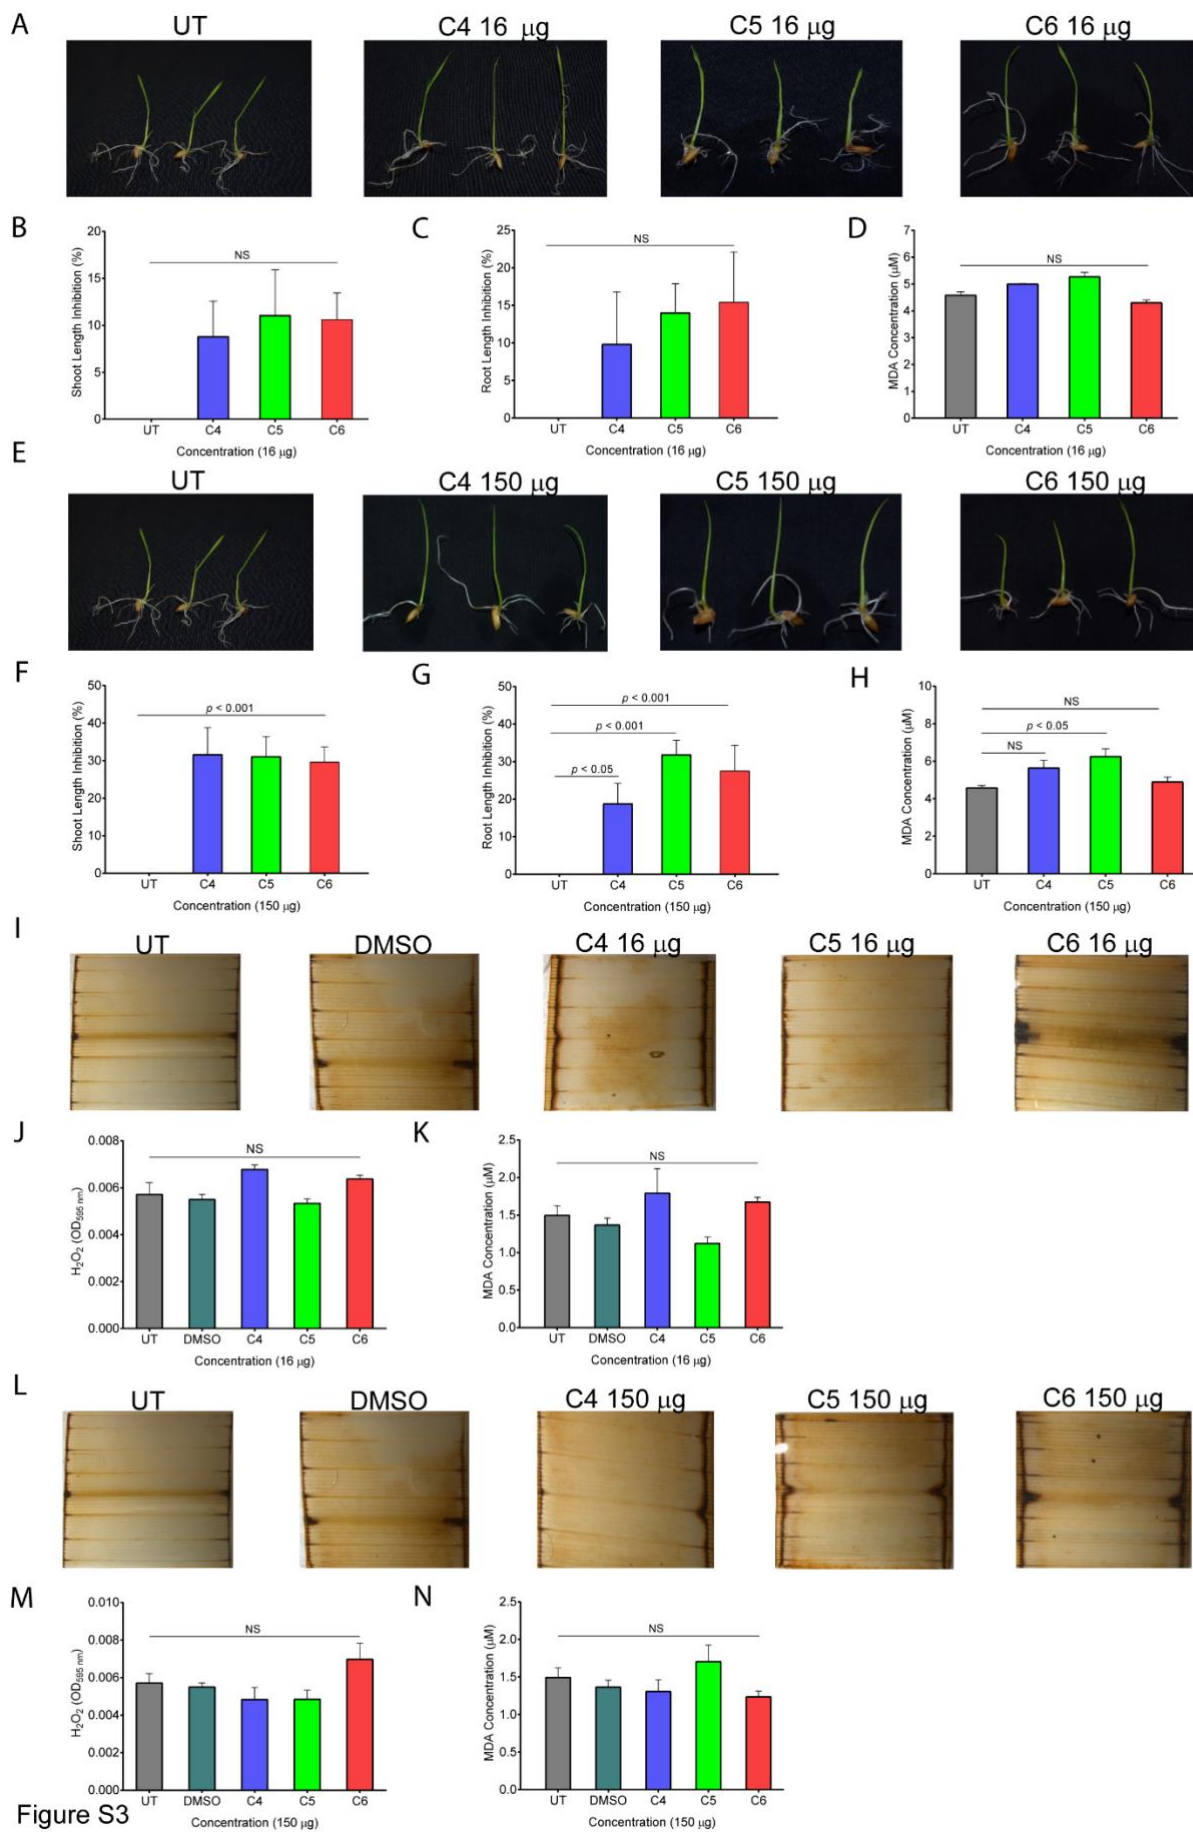

Figure S3

**Figure S3: Toxicity assessment of CAGCs on rice *Taichung Native 1 (TN1)* seedlings and leaves. Toxicity assessment in seedlings, (A & E) Rice seedling of *TN1* susceptible variety grown on 16 and 150  $\mu\text{g}$  of C4, C5 and C6 treatment. Seedlings grown in distilled water are used as control. Photographs were taken after 7-days of exposure, (B & F). Inhibition of shoot length, (C & G) Root length and (D & H) Lipid peroxidation derived malondialdehyde (MDA) levels in rice seedlings. At 16 $\mu\text{g}$  no significant effect on the shoot length, root length inhibition ( $\alpha=0.05$ , \*\*\*\* $p<0.0001$ ). Error bars indicate values of means  $\pm$  SE from minimum ten biological replicates. Significant difference were determined by using One way ANOVA with Tukeys HSD test. Toxicity assessment on excised leaf disc. (A & D) The leaf discs (1 cm) from 45-day old plants of rice *TN1* variety was exposed to 16 and 150  $\mu\text{g}$  concentrations of C4, C5 and C6. DMSO treated samples were used as control UT-untreated. Staining of leaf disc with DAB (B & E) Quantification of  $\text{H}_2\text{O}_2$  content by DAB staining, formazon absorbance at 595 nm is quantified. (C & F) Levels of lipid peroxidation as quantified by MDA concentration in the leaves treated with 16  $\mu\text{g}$  of C4, C5 and C6. The Leaf discs were dipped in DAB or Evan's stain for overnight and subsequently destained to remove chlorophyll with ethanol and the remaining formazon in leaves were photographed in bright field microscope. (Values are mean + SE from minimum three biological replicates). Significant difference were determined by using One way ANOVA with Tukey's HSD test. n.s-No significant difference.**

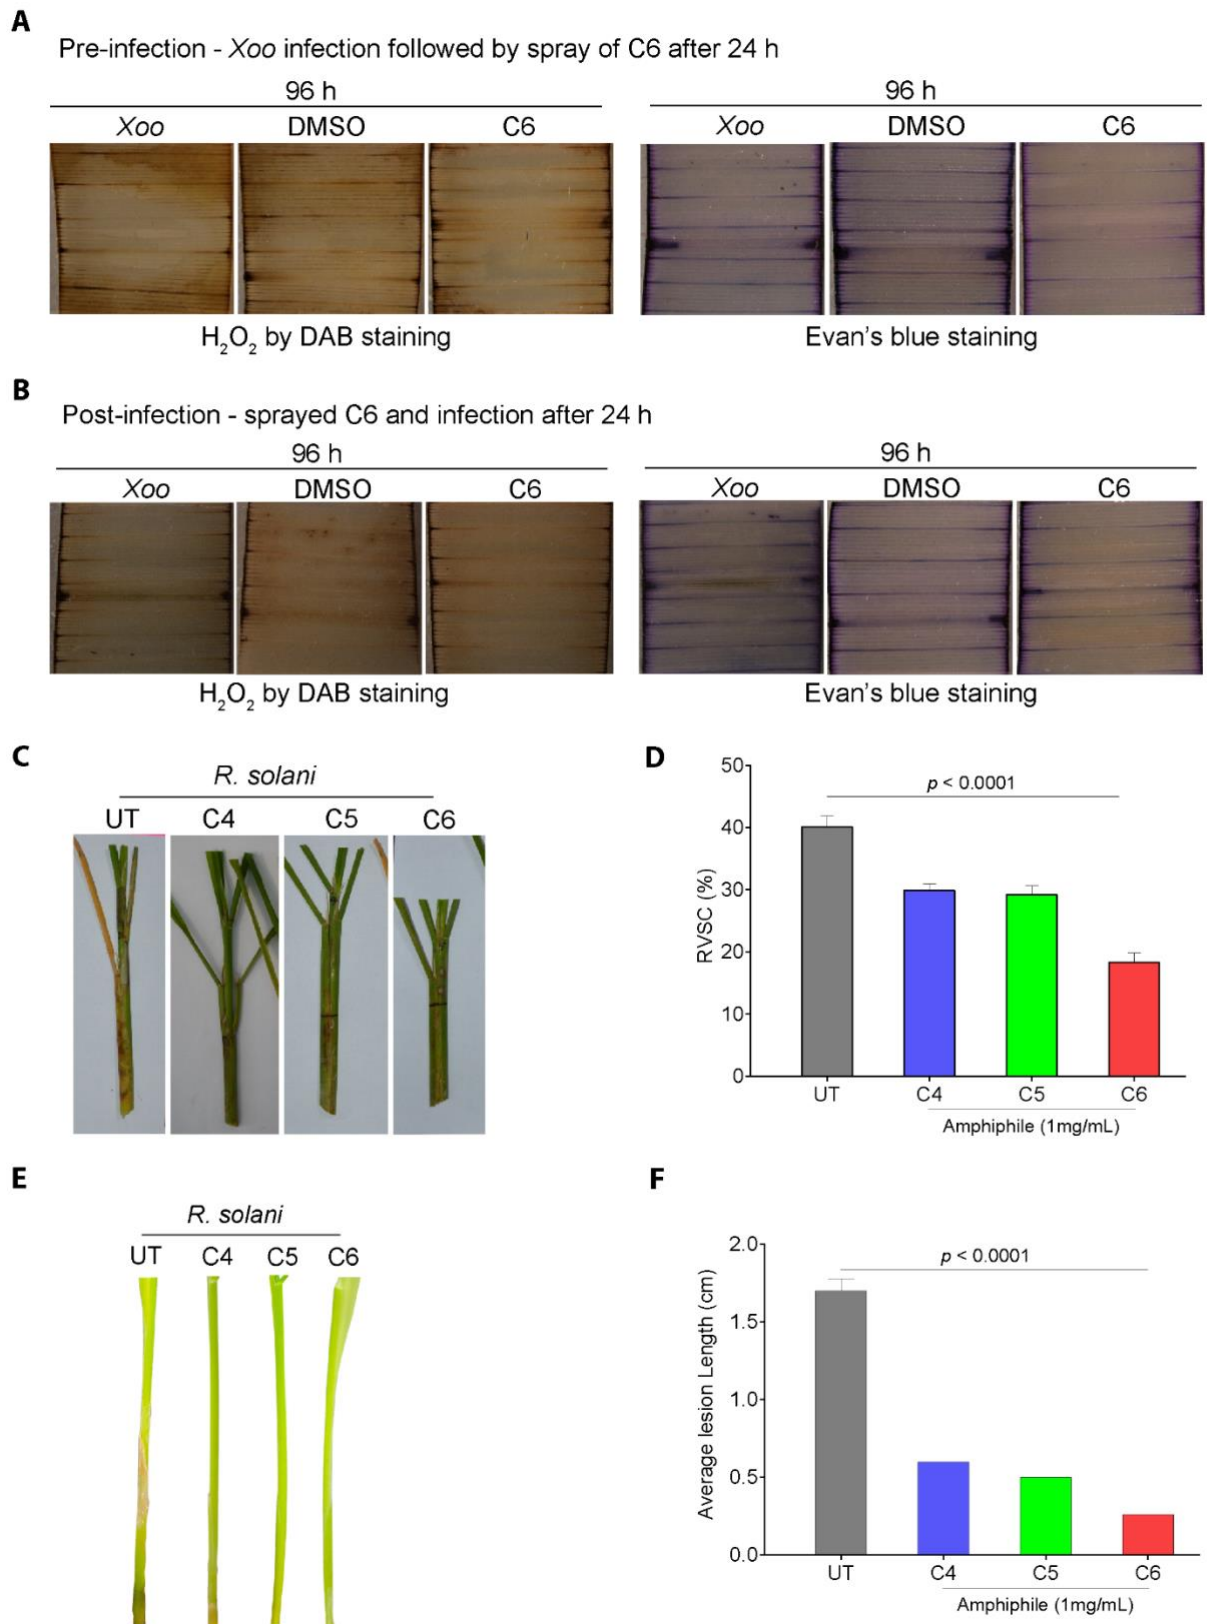

**Figure S4. CAGCs provide tolerance against *Xoo* and *R. solani*. Pathogen induced H<sub>2</sub>O<sub>2</sub> and membrane damage in *TN1* in presence of C6. (A) Quantification of H<sub>2</sub>O<sub>2</sub> by DAB staining**

and membrane damage by Evans blue staining from the leaf discs collected after 96 hpi of *Xoo* followed by C6 spray. (B) H<sub>2</sub>O<sub>2</sub> detection by DAB staining and membrane damage by Evans blue staining from Post infection of *Xoo* followed by C6 CAGC spray. The Leaf discs were dipped in DAB or Evan's stain for overnight and subsequently destained to remove chlorophyll with ethanol and the remaining formazon or Evan's blue stain in leaves were photographed in bright field microscope. (C) The effect of chemical treatment on *R. solani* infection in rice. The rice tillers sprayed either with 1mg/ml solutions of chemicals (C4, C5 and C6) or distilled water (control) were subsequently infected with *R. solani*. The phenotypic assessment of disease was performed at 6 dpi. Disease symptoms in the infected rice tillers. (D) The disease severity index (Relative vertical sheath colonization - RVSC) in *R. solani* infected samples, at 6dpi. (E) Seed priming induces defence against *R. solani* infection in rice seedlings. (F) Average lesion length in primed plants after 3 dpi. The C6 amphiphile was primed to seeds and grown in pots, the fungal sclerotia was infected and observed the effect of *R. solani* infection. Graphs show mean values  $\pm$  standard error (S.E). Statistical significant difference between indicated groups at  $p < 0.05$  (estimated by one-way ANOVA).

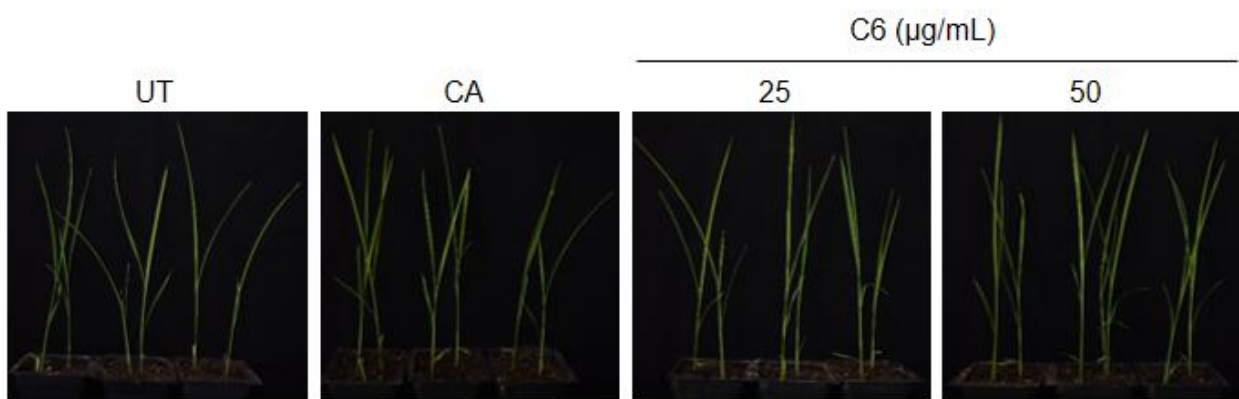

**Figure S5. Growth response of CAGC primed rice seeds.** Rice seeds were soaked with 25 and 50 µg/mL of C6 compound for priming. Seeds were germinated in pots, photographs were

taken after 15 days of germination showing no growth difference. UT- Unprimed seeds, CA-  
Cholic acid (50  $\mu\text{g}/\text{mL}$ )
